# Supplementary material for: P2rx4 deficiency in mice alleviates allergen-induced airway inflammation
Source: PubMed Central journal article supplement (PMC5348320; doi:10.18632/oncotarget.13375), 2016-11-15
Supplement: oncotarget-07-80288-s001.pdf [file oncotarget-07-80288-s001.pdf]

# **P2rx4 deficiency in mice alleviates allergen-induced airway inflammation**

## **Supplementary Methods**

### **Murine model of house dust mite extract (HDM) induced airway inflammation**

For sensitization 100 µg of HDM (*Dermatophagoides pteronyssinus*, Greer Laboratories, London, UK) was administered intratracheally to deeply anesthetized mice on day 0 and 7. I.t. instillation of HDM was repeated on day 14 as challenge. 72 h after the last HDM application mice were either sacrificed to obtain BALF cells for FACS analysis, lung sections for histology and mediastinal lymph node cells for allergen re-stimulation to determine Th2 cytokine production, or anesthetized for bronchoalveolar hyperresponsiveness measurement. Control mice received vehicle (PBS) on day 0 and 7 instead of HDM.

### **BMDC *in vitro* migration assay**

Triplicates of  $1 \times 10^5$  BMDCs in 100 µl RPMI medium without supplements (Gibco Life Technologies, Carlsbad, CA) were put in a 5 µm transwell insert placed in a 24-well plate (Corning, Amsterdam, Netherlands). Lower compartments were loaded with increasing concentrations of ATP. The plate was incubated at 37°C with 5 % CO<sub>2</sub> for 2 hours. Chemotactic index was calculated by dividing number of cells from each lower compartment by the number of migrated cells in medium control.

### **Generation of bone marrow derived macrophages (BMDM)**

The murine femur and tibia were flushed with DMEM medium containing 10 mM L-Glutamin, 10 % FCS (Biocell Laboratories, Rancho Dominguez, CA), and 1 % penicillin/streptomycin to obtain bone marrow cells.  $4 \times 10^6$  bone marrow cells were incubated at 37°C with 5 % CO<sub>2</sub> in 10 ml DMEM medium supplemented with 100

IU/ml recombinant murine macrophage colony-stimulating factor (M-CSF, Immunotools, Friesoythe, Germany). Additional 5 ml medium supplemented with M-CSF were added on day 3. On day 7 BMDMs were collected and plated in a 24-well plate using  $5 \times 10^5$  cells per well. BMDMs were activated by adding LPS (3  $\mu\text{g/ml}$ ) for 6 h.

## Supplementary table

| No.       | Sex | Age | FEV <sub>1</sub> (%pred) | Medication | Total IgE [kU/l] | Allergen specific IgE [kU/l] | Allergen |
|-----------|-----|-----|--------------------------|------------|------------------|------------------------------|----------|
| <b>AP</b> |     |     |                          |            |                  |                              |          |
| 1*        | m   | 32  | 83                       | BA, IC     | 352              | 77.1                         | DP       |
| 2*        | f   | 27  | 102                      | BA         | 226              | 14.0                         | DP       |
| 3*        | f   | 22  | 98                       | BA, IC     | 1820             | 32.1                         | DP       |
| 4*        | m   | 24  | 104                      | BA, IC     | 195              | 53.1                         | DP       |
| 5*        | f   | 26  | 79                       | BA         | 450              | 23.0                         | DP       |
| 6         | f   | 28  | 95                       | BA, IC     | 345              | 14.6                         | DP       |
| 7         | m   | 21  | 92                       | BA, IC     | 1320             | 45.7                         | Birch    |
| 8*        | f   | 22  | 89                       | BA, IC, CR | 280              | 59.7                         | Birch    |
| <b>HC</b> |     |     |                          |            |                  |                              |          |
| 1*        | f   | 30  | 97                       |            | 91               |                              |          |
| 2*        | m   | 27  | 107                      |            | 93               |                              |          |
| 3*        | m   | 28  | 94                       |            | 69               |                              |          |
| 4*        | f   | 27  | 92                       |            | 8                |                              |          |
| 5*        | m   | 25  | 114                      |            | 56               |                              |          |
| 6*        | m   | 28  | 112                      |            | 37               |                              |          |
| 7         | f   | 24  | 102                      |            | 27               |                              |          |
| 8         | m   | 27  | 97                       |            | 20               |                              |          |

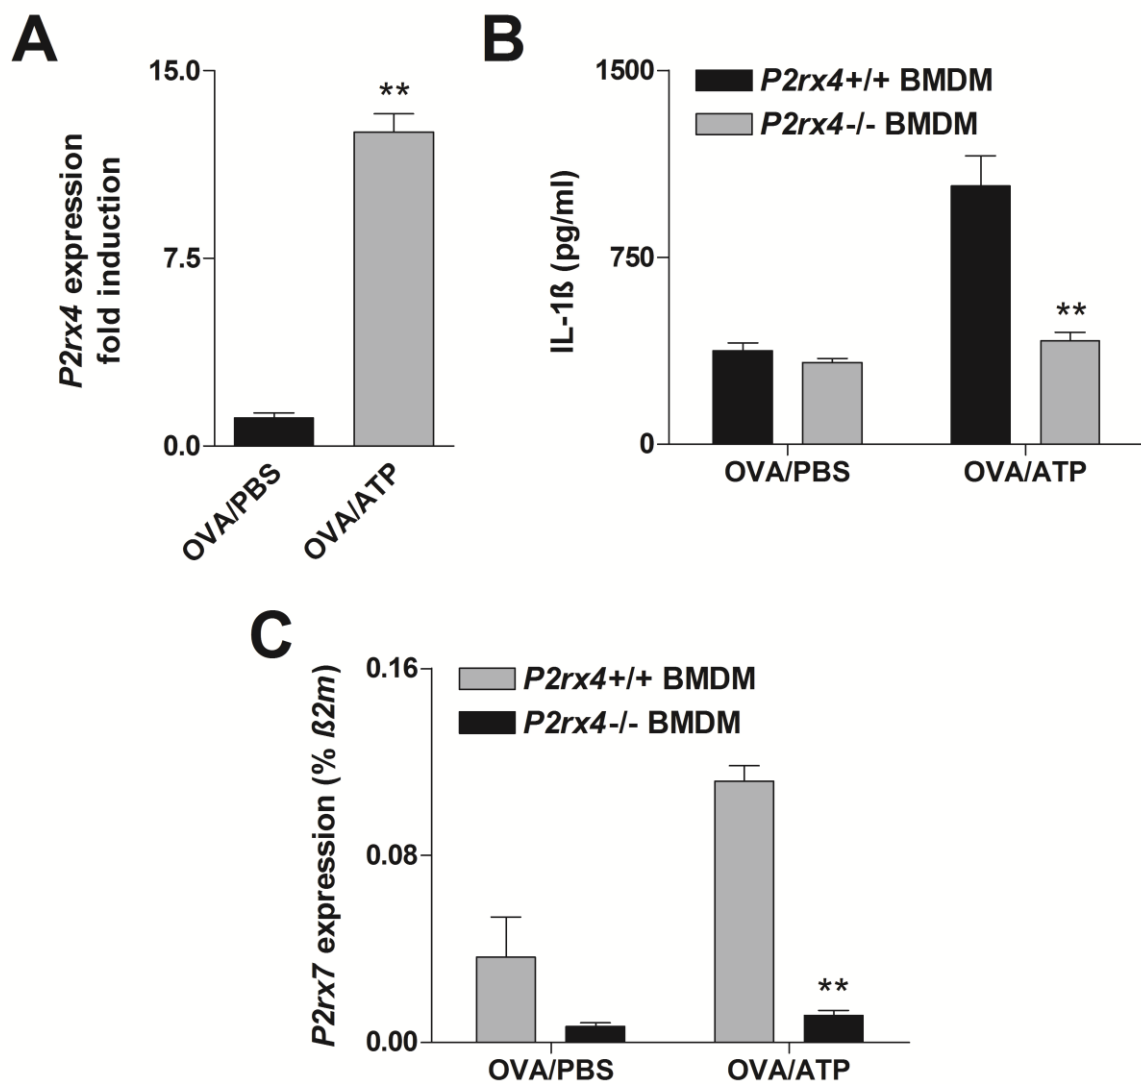

### Supplementary Figure E1

(A) *P2rx4* expression in OVA-primed bone marrow derived macrophages (BMDMs) after vehicle or ATP (1 mM) stimulation. (B) IL-1 $\beta$  release and (C) *P2rx7* expression of BMDMs isolated from WT and *P2rx4*-deficient mice 24h after PBS/PBS, OVA/PBS or OVA/ATP stimulation. The qPCR results are represented as mean  $\pm$ SD and the IL-1 $\beta$  graph shows mean  $\pm$ SEM of one experiment out of 3. \*\*  $P < 0.01$  *P2rx4*<sup>-/-</sup> vs *P2rx4*<sup>+/+</sup>. *P2rx7* Expression: *P2rx4*<sup>-/-</sup> vs *P2rx4*<sup>+/+</sup>

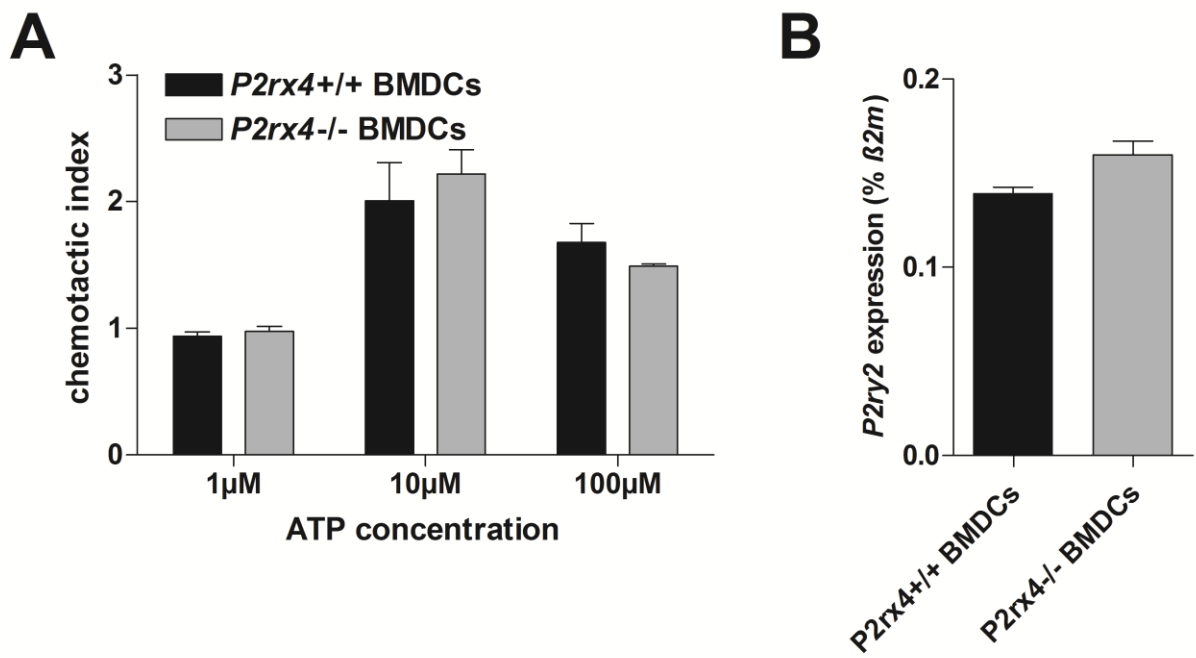

### Supplementary Figure E2

(A) *In vitro* chemotaxis of *P2rx4*<sup>+/+</sup> and *P2rx4*<sup>-/-</sup> bone marrow derived dendritic cells (BMDCs) towards different concentrations of ATP relative to PBS control. (B)

Expression of *P2ry2* in OVA-primed BMDCs stimulated with vehicle or ATP (100 μM).

Migration graph shows mean ±SEM and *P2ry2* expression is represented as mean ±SD of one experiment out of 3.
